# Supplementary material for: Applications and potential mechanisms of herbal medicines for rheumatoid arthritis treatment: a systematic review
Source: Royal Society of Chemistry journal article supplement (doi:10.1039/c9ra04737a), 2019-01-01
Supplement: c9ra04737a1.pdf [file c9ra04737a1.pdf]

Table S1. Transgenic arthritis animal model.

| Model                       | Characteristics                                                                                                                                                                                               | Refs |
|-----------------------------|---------------------------------------------------------------------------------------------------------------------------------------------------------------------------------------------------------------|------|
| TNF- $\alpha$ mice          | Overexpression of the human TNF- $\alpha$ gene, synovial inflammatory vasospasm and bone erosion.                                                                                                             | [26] |
| K/B $\times$ N mice         | Glucose-6-phosphate isomerase is highly recognized, and its mechanism of action involves complement activation and mast cell degranulation, and is not only mediated by TNF but also mediated by IL-1.        | [27] |
| SKG mice                    | A point mutation in ZAP-70 induces inflammatory arthritis in part reflecting altered thymic T-cell selection.                                                                                                 | [28] |
| Human/SCID mosaic mice      | Synovial-induced arthritis in RA patients, synovial damage and bone erosion.                                                                                                                                  | [29] |
| Human DR4-CD4 mice          | Contains four and human CD4 molecules, class II alleles associated with human leukocyte antigen, HLA-DR*0401 and human CD4 molecules, a RA-related human auto-antigenic protein (HCgp-39), and a TCR (TCR-ab) | [30] |
| HLA class II mice           | Several HLA class II transgenic mice have been generated using different risk and protection associated loci – see.                                                                                           | [31] |
| PTPN22 polymorphisms murine | Polymorphisms by PTPN22 may ultimately affect homologous antigen T cell recognition.                                                                                                                          | [32] |
| IL-1RA $^{-/-}$             | Deficiency of IL-1 receptor antagonist results in spontaneous destructive arthritis. Disease is IL-17 and T cell dependent.                                                                                   | [33] |
| F759                        | Direct joint damage and consequent microbleeding facilitate arthritis development in mice expressing a variant of the IL-6 signaling transducer gp130.                                                        | [34] |

Table S2. The mechanism of CHMs and prescription anti-RA.

| Formula                    | Extraction                                                                                         | Model                             | Mechanism                                                                                                                             | Effect                                                                                      | Refs |
|----------------------------|----------------------------------------------------------------------------------------------------|-----------------------------------|---------------------------------------------------------------------------------------------------------------------------------------|---------------------------------------------------------------------------------------------|------|
| Wu-tou decoction           | Water extraction                                                                                   | CIA rats, chicken embryos, HUVECs | Inhibition of VEGFR2 signaling pathway                                                                                                | Inhibition of vascular proliferation                                                        | [57] |
| Wu-tou formula             | Concentrated after water extraction                                                                | AIA rats                          | Regulation of phenylalanine, tyrosine and tryptophan biosynthesis, taurine and hypotaurine metabolic pathways.                        | Improve synovial inflammation and hyperplasia, bone damage.                                 | [58] |
| Danggui Sini decoction     | Concentrated after water extraction                                                                | CIA rats                          | Regulation of taurine and hypotaurine, intestinal microbiota, pyruvate, glycolysis/gluconeogenesis, TCA circulating lipid metabolism. | Anti-inflammatory, improve bone erosion.                                                    | [59] |
| Huang-Lian-Jie-Du-Tang     | The water is extracted and lyophilized                                                             | CIA rats                          | Improve energy metabolism.                                                                                                            | Improve synovial hyperplasia, inflammatory cell infiltration, and partial bone destruction. | [60] |
| Kuan-Jin-Teng              | The ethanol extract was extracted with an organic reagent and the EtOAc fraction was concentrated. | CIA rats, RAW264.7 cells          | Inhibits the production of pro-inflammatory cytokines and down-regulates the MAPK signaling pathway.                                  | Relieve inflammatory cell infiltration and bone destruction.                                | [61] |
| Simiao Pill                | Extract and concentrate, granulate. (FDA's 2010 version of GMP)                                    | CIA rats                          | Regulate the ATX-LPA and MAPK pathways.                                                                                               | Relieve synovial hyperplasia, vasospasm and bone erosion.                                   | [55] |
| Wenjinghuoluo prescription | The water is extracted and lyophilized                                                             | CIA mice                          | The JAK2/STAT3 pathway and Th17 cells are specifically regulated.                                                                     | Reduces proinflammatory cytokines and inhibits bone erosion and osteophyte formation.       | [62] |
| Bi-Qi capsule              | The water is extracted and lyophilized                                                             | CIA rats                          | Alleviates the levels of cartilage oligomeric matrix protein and osteopontin.                                                         | Reduce inflammation, synovial hyperplasia, and cartilage destruction.                       | [63] |
| Xitong Wan                 | The water is extracted and lyophilized                                                             | AIA rats                          | Inhibits the NF- $\kappa$ B inflammatory pathway.                                                                                     | Anti-inflammatory, inhibiting the number of osteoclasts.                                    | [64] |
| Fu-Fang-Lu-Jiao-Shuang     | Water extraction, drying under reduced pressure.                                                   | CIA mice                          | Decreased MMP-1, MMP3 but increased the expression of TIMP-1 and decreased the levels of TNF- $\alpha$ , IL-1 $\beta$ , IL-17, PGE-2. | Relieve synovial hyperplasia, partial bone destruction and inflammatory cell infiltration.  | [65] |
| Huo-Luo-Xiao-Ling Dan      | A water-soluble suspension of raw herbs.                                                           | AIA rats                          | Inhibition of osteoclast function-related factor activity (NF- $\kappa$ B; RANKL and MMP).                                            | Reduce bone damage.                                                                         | [66] |
| Shuangtengbitong tincture  | The filtrate was                                                                                   | CIA rats                          | Protein and mRNA expression levels of                                                                                                 | Improve synovial                                                                            | [67] |

|                                                                                        |                                                                                                                                                                                                                                |                                    |                                                                                                                                                                           |                                                                                                                             |      |
|----------------------------------------------------------------------------------------|--------------------------------------------------------------------------------------------------------------------------------------------------------------------------------------------------------------------------------|------------------------------------|---------------------------------------------------------------------------------------------------------------------------------------------------------------------------|-----------------------------------------------------------------------------------------------------------------------------|------|
|                                                                                        | combined after ethanol extraction.                                                                                                                                                                                             |                                    | TLR4, MyD88 and NF- $\kappa$ B were inhibited.                                                                                                                            | hyperplasia, excessive inflammation, cartilage and bone destruction.                                                        |      |
| Xianfanghuomingyin                                                                     | No mention was made in the text.                                                                                                                                                                                               | CIA mice                           | Down-regulation of abnormal differentiation of Th1 and Th17 cells, and up-regulation of Th2 and Treg cells.                                                               | Reduce cartilage damage and vasospasm formation.                                                                            | [68] |
| Smilax glabra Roxb. (Tufuling) and Bolbostemma paniculatum (Maxim.) Franquet (Tubaimu) | After ethanol extraction, it was rotary evaporated and extracted with n-butanol.                                                                                                                                               | Carrageenan-induced arthritis rats | Reduce the levels of IL-1 $\beta$ , IL-6 and TNF- $\alpha$ .                                                                                                              | Reduces obvious edema and massive inflammatory cell infiltration.                                                           | [69] |
| Eucommia ulmoides Oliv (Duzhong)                                                       | Ethanol, ethyl acetate and n-butanol were separately extracted.                                                                                                                                                                | CIA rats                           | Improve RANKL / OPG ratio and inhibit NF- $\kappa$ B pathway                                                                                                              | Improve inflammatory cell infiltration, synovial hyperplasia, synovitis, vasospasm formation, cartilage degradation.        | [70] |
| Periploca forrestii Schltr                                                             | The ethanol was extracted, concentrated under reduced pressure, and the precipitate was collected after water-soluble, and the ethanol component of the macroporous resin was collected after acidifying the aqueous solution. | CIA rats, MH7A cells               | Inhibition of the NF- $\kappa$ B and MAPK pathways.                                                                                                                       | Reduces severe necrosis of chondrocytes, proliferation of fibrous tissue and extensive inflammatory cell infiltration.      | [71] |
| Silkworm excrement                                                                     | Extracted separately with ethanol and water and concentrated in vacuo.                                                                                                                                                         | AIA rats                           | Regulation of niacin and nicotinamide, pentose and glucuronic acid conversion, TCA cycle, $\beta$ -alanine metabolism, purine metabolism, glycolysis and gluconeogenesis. | Improve synovial hyperplasia, peripheral tissue mononuclear cell infiltration, cartilage erosion and joint cavity stenosis. | [72] |
| Circaea mollis Sieb. & Zucc                                                            | The ethanol was extracted and concentrated by heating.                                                                                                                                                                         | AIA mice                           | Down-regulation of TNF- $\alpha$ , IL-1 $\beta$ upregulates IL-10 levels.                                                                                                 | Relieve synovial hyperplasia, inflammatory infiltration, cartilage destruction.                                             | [73] |
| Caulophyllum robustum Maxim                                                            | After the ethanol extraction, the macroporous resin was separated, and the ethanol eluate was dried.                                                                                                                           | CIA mice, RAW264.7 cells.          | The levels of IL-1, IL-6, TNF- $\alpha$ and PGE-2 and the expression of NF- $\kappa$ B p65 were reduced.                                                                  | Reduce synovial damage, inflammatory cell infiltration and telangiectasia.                                                  | [74] |
| Aconiti Sinomontani Radix                                                              | The aqueous solution                                                                                                                                                                                                           | SW982 cells                        | Inhibition of Wnt5a-mediated JNK and                                                                                                                                      | Targeting regulates                                                                                                         | [75] |

|                             |                                                                                                                                                                                                               |                 |                                                                                                                                                                                                                                                                                                           |                                                                                                 |      |
|-----------------------------|---------------------------------------------------------------------------------------------------------------------------------------------------------------------------------------------------------------|-----------------|-----------------------------------------------------------------------------------------------------------------------------------------------------------------------------------------------------------------------------------------------------------------------------------------------------------|-------------------------------------------------------------------------------------------------|------|
|                             | was decomposed, concentrated under reduced pressure, and concentrated under reduced pressure after ethanol precipitation. The pH was adjusted by NaOH and then separated by CH <sub>2</sub> CL <sub>2</sub> . |                 | NF-κB pathways.                                                                                                                                                                                                                                                                                           | proliferation and migration of SW982 cells.                                                     |      |
| Urtica dentata Hand         | The ethanol and water were separated and extracted, and the macroporous resin was separated and ethanol was eluted, and the ethanol component was lyophilized.                                                | CIA mice        | The production of IFN-γ and IL-2 was significantly reduced, the increase in IL-10 and TGF-β, and the inhibition of T-bet expression in DC, induced the production of CD4 + CD25 + Treg cells with the Treg phenotype Foxp3. Low expression of MHC class II and CD86 molecules, and reduction of IL-12p70. | Relieve vasospasm and bone erosion.                                                             | [76] |
| PeriplocaforrestiiSchltr    | After ethanol extraction, it was dried under reduced pressure.                                                                                                                                                | CIA rats        | Inhibition of the Src/NF-κB signaling pathway.                                                                                                                                                                                                                                                            | Reduce synovial hyperplasia and massive mononuclear cell infiltration.                          | [77] |
| Clematidis Radix et Rhizoma | A series of HPLC extraction and separation <sup>[78]</sup>                                                                                                                                                    | CIA rats        | Regulation of glycerophospholipids, sphingolipids, arachidonic acid metabolism, pantothenic acid and CoA biosynthesis.                                                                                                                                                                                    | Relieve articular cartilage swelling and narrowing of the gap, joint subluxation and stiffness. | [79] |
| Eucommia ulmoidesOliv       | The ethanol was extracted and dried under vacuum.                                                                                                                                                             | CIA rats        | Decreased RANKL mRNA expression and promoted OPG mRNA expression.                                                                                                                                                                                                                                         | Inhibits synovial cell proliferation and reduces cartilage and bone degradation.                | [80] |
| Gentiana macrophylla Pall   | After ethanol extraction, it is dried under vacuum, and the organic reagent is separated after water dissolution and dried under vacuum.                                                                      | CIA rats        | Reduce levels of IL-1β, IL-6 and TNF-α and down-regulate levels of iNOS and COX-2.                                                                                                                                                                                                                        | Reduce synovial inflammatory cell infiltration and synovial hyperplasia.                        | [81] |
| Litsea cubeba               | After ethanol extraction, it was vacuum dried, dissolved in water, and then separated                                                                                                                         | RAW 264.7 cells | Inhibition of the NF-κB signaling pathway.                                                                                                                                                                                                                                                                | Anti-inflammatory.                                                                              | [82] |

|                                                             |                                                                                                                                   |                                                    |                                                                                                                                                        |                                                                                                            |      |
|-------------------------------------------------------------|-----------------------------------------------------------------------------------------------------------------------------------|----------------------------------------------------|--------------------------------------------------------------------------------------------------------------------------------------------------------|------------------------------------------------------------------------------------------------------------|------|
|                                                             | and eluted. The eluate was dried under vacuum.                                                                                    |                                                    |                                                                                                                                                        |                                                                                                            |      |
| <i>Clematis terniflora</i> DC                               | After the ethanol extraction, the macroporous resin was separated, and the ethanol recovery liquid was collected.                 | Carrageenan-induced arthritis rats, RAW264.7 cells | Reduce NO and PGE2 levels.                                                                                                                             | Reduces inflammatory cell infiltration and improves tissue damage.                                         | [83] |
| <i>Celastrus aculeatus</i> Merr                             | After ethanol extraction and concentration, the concentrate was combined in celite and extracted with ethyl acetate.              | AIA rats                                           | Apoptosis of CD4(+) CD25(+) FOXP3(+) T cells was induced.                                                                                              | Relieve synovial tissue hyperplasia and inflammatory cell infiltration.                                    | [84] |
| <i>Securidacainappendiculata</i> Hassk                      | The ethanol was extracted and separated, and then rotary evaporated, and the crude product was extracted with an organic reagent. | Carrageenan-induced arthritis mice                 | Reduce PGE2 levels, inhibit carbon clearance, and block lymphocyte transformation and proliferation.                                                   | Anti-inflammatory, analgesic and immunosuppressive.                                                        | [85] |
| <i>Vitex negundo</i> L                                      | After ethanol extraction, it was dried under reduced pressure.                                                                    | AIA rats                                           | Reduce levels of TNF- $\alpha$ , IL-1 $\beta$ , IL-6, COX-2, and 5-LOX, but increase IL-10.                                                            | Improve synovial lining hyperplasia and mononuclear cell infiltration of synovial tissue.                  | [86] |
| <i>Bauhinia championii</i>                                  | The filtrate after ethanol extraction was concentrated in vacuo.                                                                  | CIA rats                                           | Down-regulation of protein and mRNA expression of TLR 4, MyD 88 and NF- $\kappa$ B.                                                                    | Improve synovial hyperplasia, inflammatory cell infiltration, blood vessels, hyperplasia and bone erosion. | [87] |
| <i>Litsea cubeba</i> (Lour.) Pers                           | The filtrate after ethanol extraction was dried under reduced pressure.                                                           | AIA rats                                           | The levels of TNF- $\alpha$ , IL-1 $\beta$ and IL-6, COX-2 and 5-LOX are decreased, and IL-10 levels are elevated.                                     | Relieve inflammatory cell infiltration and synovial hyperplasia.                                           | [88] |
| <i>Aconitum carmichaeli</i> with <i>Ampelopsis japonica</i> | Concentrate after water extraction.                                                                                               | CIA rats                                           | Regulates galactose, glycerolipid and inositol phosphate metabolism.                                                                                   | Reduce foot swelling.                                                                                      | [89] |
| <i>Kadsura heteroclita</i> (Roxb) Craib                     | Concentrate after ethanol extraction.                                                                                             | AIA rats                                           | Inhibition of TNF- $\alpha$ , IL-1 $\beta$ , IL-6, IL-17A and IL-17F production, inhibition of MMP-1 and MMP-3 and increase TIMP-1 protein expression. | Reduce inflammatory cell infiltration, synovial hyperplasia and vasospasm formation.                       | [90] |
| <i>Vitex negundo</i>                                        | A series of HPLC extraction and                                                                                                   | CIA rats                                           | Decreased levels of IL-1 $\beta$ , IL-6, IL-8, IL-17A, TNF- $\alpha$ , MMP-3 and MMP-9                                                                 | Reduce infiltration of inflammatory cells, synovial                                                        | [91] |

|                           |                                                                                                                                     |                            |                                                                                                                                   |                                                                                                                  |      |
|---------------------------|-------------------------------------------------------------------------------------------------------------------------------------|----------------------------|-----------------------------------------------------------------------------------------------------------------------------------|------------------------------------------------------------------------------------------------------------------|------|
|                           | separation                                                                                                                          |                            | increased IL-10 levels. Decreased expression of COX-2, iNOS and p-IκB increased IκB expression.                                   | hyperplasia and cartilage damage.                                                                                |      |
| Flemingiaphilippinensis   | Concentrate after ethanol extraction.                                                                                               | CIA mice                   | Inhibition of NF-κB and MAPK signaling pathways.                                                                                  | Inhibition of osteoclast infiltration into the medullary cavity and angiogenesis.                                | [92] |
| Anoectochilusroxburghii   | After the alcohol is lifted, the water is extracted and precipitated, and the organic reagent is eluted to collect the precipitate. | CIA rats, RAW264.7 cells   | Inhibition of phosphorylation of IκB and p65 and activation of the NF-κB pathway down-regulate mRNA expression of IL-1β and IL-6. | Improve inflammatory cell infiltration and synovial tissue destruction.                                          | [93] |
| CircaeamollisSieb. &Zucc. | Concentrate after ethanol extraction.                                                                                               | DMB-induced arthritis mice | The proinflammatory cytokine TNF-α, IL-1β and the anti-inflammatory factor IL-10 are regulated.                                   | It relieves synovial hyperplasia, controls the infiltration of inflammation, and protects cartilage from damage. | [73] |

**Table S3.** Compounds of CHMs antagonize the mechanism of RA.

| Components            | Classifications | Model                                 | Mechanism                                                                                                                                                                                                                                                                                     | Effect                                                                                        | Refs  |
|-----------------------|-----------------|---------------------------------------|-----------------------------------------------------------------------------------------------------------------------------------------------------------------------------------------------------------------------------------------------------------------------------------------------|-----------------------------------------------------------------------------------------------|-------|
| Celastrol             | Triterpenoids   | AIA rats                              | RANTES, MCP-1, MIP-1 $\alpha$ and GRO/KC and the levels of TNF- $\alpha$ and IL-1 $\beta$ which induce them are decreased, and the level of CCR1 is increased.                                                                                                                                | Inhibits leukocyte migration.                                                                 | [94]  |
| Celastrol             | Triterpenoids   | CIA mice, RAW264.7 cells              | RANKL-induced osteoclast gene and transcription factor expression, as well as phosphorylation of NF- $\kappa$ B and MAPK were reduced.                                                                                                                                                        | Relieve inflammatory cell infiltration and synovial hyperplasia.                              | [95]  |
| Celastrol             | Triterpenoids   | AIA rats                              | Prevent STAT3 activation and reduce the levels of IL-6 and IL-1 $\beta$ , CCL3, and CCL5.                                                                                                                                                                                                     | Th17 is reduced but Treg cells are increased.                                                 | [96]  |
| Esculentic acid       | Triterpenoids   | Carrageenan-induced arthritis mice    | Inhibition of TNF- $\alpha$ , IL-6 and PGE2 levels.                                                                                                                                                                                                                                           | Anti-inflammatory and analgesic.                                                              | [97]  |
| Betulinic acid        | Triterpenoids   | CIA mice, RA-FLSs                     | Block NF- $\kappa$ B signaling pathway activation.                                                                                                                                                                                                                                            | Relieve synovial inflammation and joint destruction, inhibit cell proliferation and invasion. | [98]  |
| Triptolide            | Terpenoids      | AIA rats                              | It inhibits the expression of neutrophils IL-6 and TNF- $\alpha$ , inhibits neutrophil migration, NETosis and autophagy, and promotes apoptosis.                                                                                                                                              | Relieves multiple inflammatory cell infiltration, synovial fibrosis and bone erosion.         | [99]  |
| Astragaloside IV      | Terpenoids      | AIA rats                              | Reduce IL-1 $\beta$ , TNF $\alpha$ and NO levels, inhibit cartilage proteoglycan synthesis and chondrocyte proliferation.                                                                                                                                                                     | Relieve bone damage.                                                                          | [100] |
| Artesunate            | Terpenoids      | Human RA-FLSs                         | Inhibition of PDK1-induced phosphorylation of Akt and RSK2.                                                                                                                                                                                                                                   | Inhibition of migration and invasion of RA-FLS.                                               | [101] |
| Sinomenine            | Alkaloids       | MSCs and RAW264.7 cells.              | Increase the ratio of OPG/RANKL.                                                                                                                                                                                                                                                              | Reduce the number of osteoclasts.                                                             | [102] |
| Sinomenine            | Alkaloids       | CIA rats                              | Regulate the expression of 79 proteins.                                                                                                                                                                                                                                                       | Improve inflammatory cell infiltration and synovial hyperplasia.                              | [103] |
| Sinomenine            | Alkaloids       | RA patients, CIA mice, RAW264.7 cells | Regulation of IL-6, GM-CSF, IL-12 p40, IL-1 $\alpha$ , TNF- $\alpha$ , IL-1 $\beta$ , KC (CXCL1), Eotaxin-2, IL-10, M-CSF, RANTES, and MCP-1 secretion CD11b + F4 / 80 + CD64 + resident macrophages, CD11b + Ly6C + CD43 + macrophages and CD14 + CD16 + peripheral blood mononuclear cells. | Improve inflammatory cell infiltration and synovial hyperplasia.                              | [104] |
| Oxymatrine            | Alkaloids       | CIA rats                              | Decreased levels of TNF- $\alpha$ , IL-17A and ROR $\gamma$ t, up-regulated FOXP3 levels, and regulated Treg/Th17 imbalance.                                                                                                                                                                  | Relieve inflammatory cell infiltration and synovial hyperplasia.                              | [105] |
| Daphnetin             | Coumarins       | LPS-induced calvarial osteolysis mice | Inhibition of RANKL-ERK and NFATc1 signaling pathways.                                                                                                                                                                                                                                        | Inhibits osteolysis.                                                                          | [51]  |
| 3R-(4'-hydroxyl-3'-O- | Coumarins       | Rat FLS cells                         | Inhibition of NF- $\kappa$ B and JNK signaling                                                                                                                                                                                                                                                | Anti-inflammatory.                                                                            | [106] |

|                                                             |                |                           |                                                                                                                                                      |                                                                                              |       |
|-------------------------------------------------------------|----------------|---------------------------|------------------------------------------------------------------------------------------------------------------------------------------------------|----------------------------------------------------------------------------------------------|-------|
| $\beta$ -D-glucopyranosyl<br>phenyl)-dihydro<br>isocoumarin |                |                           | pathways.                                                                                                                                            |                                                                                              |       |
| Scopoletin                                                  | Coumarins      | AIA rats                  | Down-regulation of VEGF, overexpression of basic fibroblast growth factor and IL-6.                                                                  | Inhibition of vascular proliferation in the synovium.                                        | [107] |
| Prim-O-glucosylcimifugin                                    | Saponins       | AIA rats, SGC7901 GC cell | Reduce TNF $\alpha$ , IL-1 $\beta$ and IL-6 levels and down-regulate COX-2 expression.                                                               | Anti-inflammatory and analgesic.                                                             | [108] |
| Clematichinenoside AR                                       | Saponins       | CIA rats                  | Inhibition of SDH activity and hypoxia TGF- $\beta$ 1 induce and inhibit succinate-associated NLRP3 inflammasome activation.                         | Inhibition of synovial muscle fibrosis.                                                      | [109] |
| Dioscin                                                     | Saponins       | CIA mice, Th17 cells      | It inhibits the Th17 cell immune response and reduces the production of IL-17A.                                                                      | Inhibits synovitis and bone erosion.                                                         | [110] |
| Polyphyllin I                                               | Saponins       | CIA mice, BMMs, PEMs      | Reduces the production of inflammatory cytokines, inhibits phosphorylation of IKK $\alpha$ / $\beta$ and p65, and prevents p65 nuclear localization. | Reduces bone erosion and synovitis.                                                          | [111] |
| 1,7-Dihydroxy-3,4-dimethoxyxanthone                         | Flavonoids     | MH7A cells                | P-p38p21 and cyclin D1, which regulate the MAPKs signaling pathway.                                                                                  | Inhibition of proliferation of MH7A cells.                                                   | [112] |
| Kaempferol                                                  | Flavonoids     | CIA rats, Treg cells      | Reduce PIM1-mediated FOXP3 phosphorylation in S422 and increase FOXP3 expression levels in Treg cells.                                               | Inhibits inflammatory cell infiltration and bone erosion.                                    | [113] |
| Eriodictyol                                                 | Flavonoids     | Human RA-FLSs             | Blocking the activation of AKT increases the expression of FOXO1.                                                                                    | Inhibition of cell survival and inflammatory responses in RA-FLS.                            | [114] |
| $\alpha$ -Mangostin                                         | Flavonoids     | CIA rats, HFLS-RA cells   | Inhibition of iNAMPT expression inhibits NAD production, reduces ENAMPT secretion and inhibits NF- $\kappa$ B signaling.                             | Inhibition of synovial hyperplasia and bone erosion.                                         | [115] |
| Astragalin                                                  | Flavonoids     | CIA mice, MH7A cells      | Inhibition of phosphorylation of MAPK and activation of c-Jun / AP-1.                                                                                | Inhibition of synovial inflammation and bone destruction.                                    | [116] |
| Total glucosides of paeony                                  | Glycosides     | CIA rats                  | TGP regulates VEGF levels, maintains a balance of T cell subsets, and inhibits levels of intestinal cytokines SIgA and IFN- $\gamma$ .               | Inhibition of synovial tissue proliferation and reduction of inflammatory cell infiltration. | [117] |
| Sweroside                                                   | Iridoids.      | RAW264.7 cells            | Activation of SIRT1, inhibition of NF- $\kappa$ B and activation of the FOXO1 signaling pathway.                                                     | Inhibition of RAW264.7cells proliferation.                                                   | [118] |
| Emodin                                                      | Anthraquinones | AIA mice, neutrophil      | Inhibits autophagy and endotoxin in neutrophils.                                                                                                     | Relieve leukocyte infiltration, cartilage erosion and synovial hyperplasia.                  | [119] |
| Cobrotoxin                                                  | Others         | AIA rats                  | Inhibition of NF- $\kappa$ B signaling pathway and                                                                                                   | Improve synovial                                                                             | [120] |



---

|                                                                     |                                                                     |
|---------------------------------------------------------------------|---------------------------------------------------------------------|
| regulation of abnormal proportion of CD4 + T cells / CD8 + T cells. | hyperplasia, inflammatory cell infiltration, cartilage destruction. |
|---------------------------------------------------------------------|---------------------------------------------------------------------|

---
